# Supplementary material
Source: publisher figshare collection journal article supplement (https://acs.figshare.com/ndownloader/files/9298219)
Supplement: Supplementary file 1 [file 9298219]

## Supporting Information

### Nanoscale chemical characterization of solid state microbattery stacks by means of Auger Spectroscopy and ion-milling cross-section preparation

A.Uhart<sup>1</sup>, J.B. Ledeuil<sup>1\*</sup>, B. Pecquenard<sup>2</sup>, F. Le Cras<sup>3,4</sup>, M. Proust<sup>5</sup>, H. Martinez<sup>1\*</sup>

<sup>1</sup>IPREM ECP – UMR CNRS 5254. Université de Pau et des Pays de l'Adour, Hélioparc Pau-Pyrénées, 2 Avenue du Président Angot, 64053 Pau Cedex 9, France

<sup>2</sup>CNRS, Université de Bordeaux, ICMCB–UPR 9048 and Bordeaux INP, 87 Avenue du Dr. Schweitzer, F-33600 Pessac, France

<sup>3</sup>CEA LETI, 17 rue des Martyrs, F-38054 Grenoble, France

<sup>4</sup>Université Grenoble Alpes, F-38000 Grenoble, France

<sup>5</sup>ST Microelectronics, 10 rue Thalès de Milet CS 97155, 37071, Tours, France

Corresponding author: jean-bernard.ledeuil@univ-pau.fr

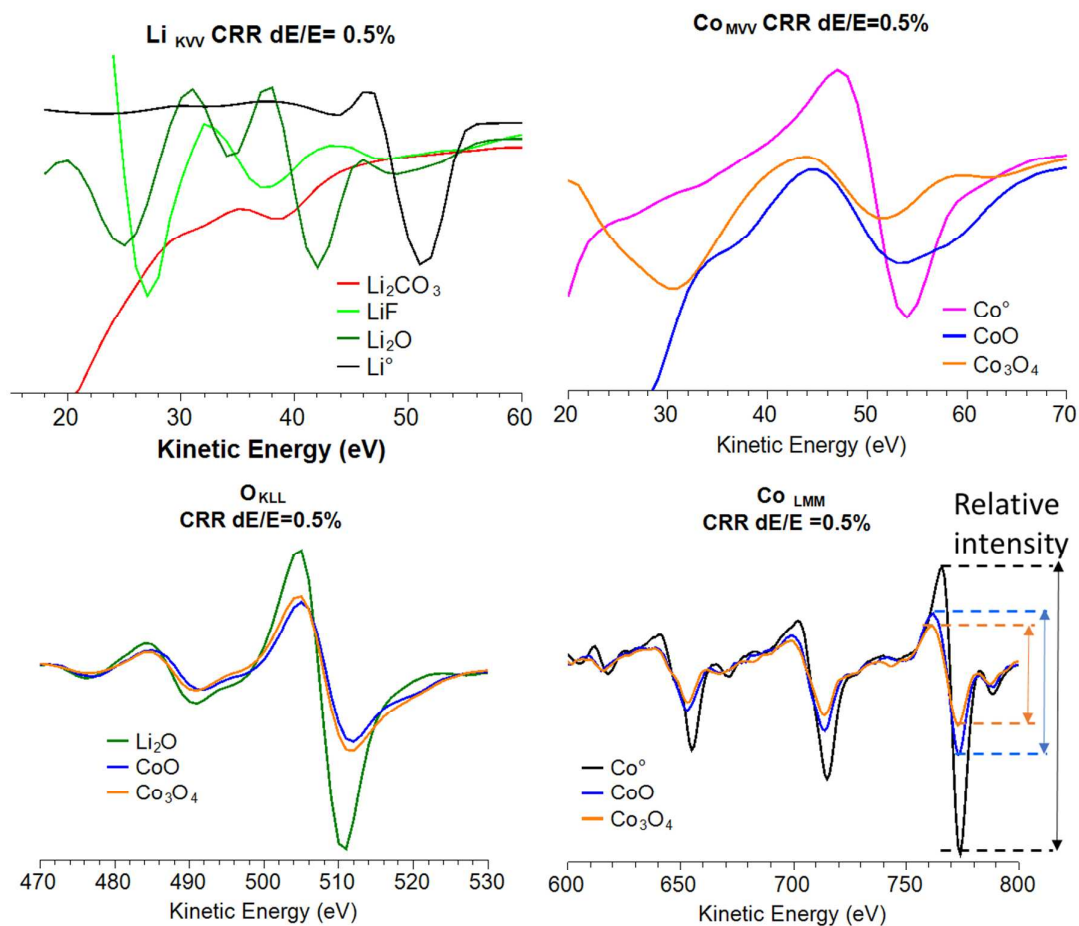

**Figure S1:** Reference spectra of lithium metal,  $\text{Li}_2\text{O}$ ,  $\text{LiF}$ , Co metal,  $\text{CoO}$  and  $\text{Co}_3\text{O}_4$  used in the Absolute Intensity quantification method.

S2 and S3 figures display the XPS spectra for respectively Li 1s and C 1s core peaks.

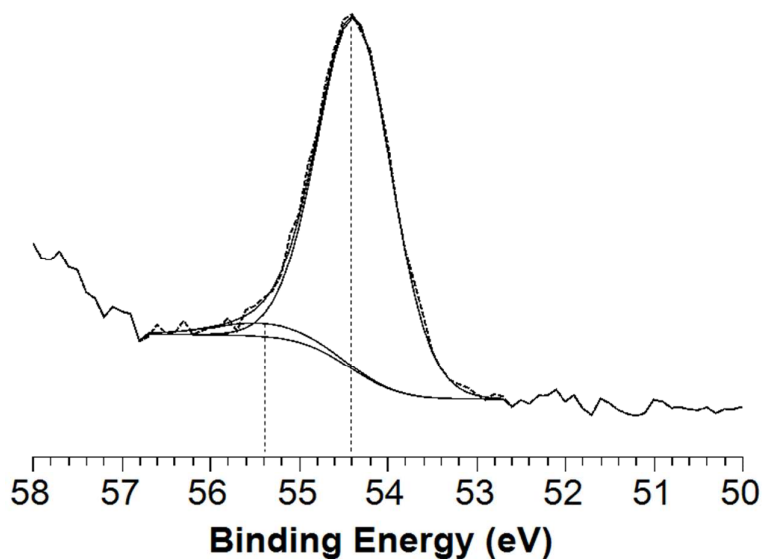

**Figure S2:** additional Li 1s XPS spectrum of as-deposited LiCoO<sub>2</sub> sample

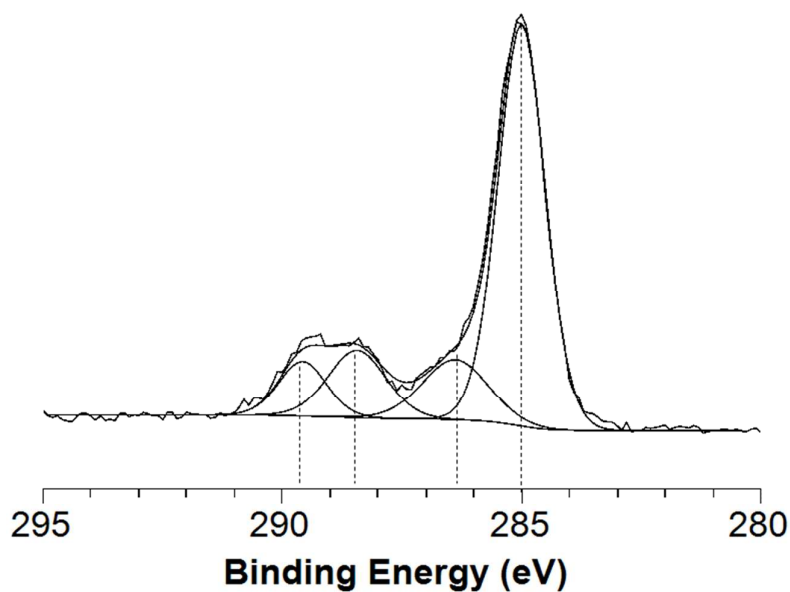

**Figure S3:** additional C 1s XPS spectrum of as-deposited LiCoO<sub>2</sub> sample, component assignments: C-C/C-H at 285.0 eV (% at. =12.2), C-O at 286.4 eV (% at. =2.6), C-O<sub>2</sub> at 288.4 eV (% at. =1.9) and C-O<sub>3</sub> at 289.5 eV (% at. =1.0)

**Comments concerning S2 and S3 figures:**

A few amount of lithium carbonates ( $\sim 6\%$ ), due to the elaboration process, have been observed in XPS. Indeed, the C1s spectrum exhibits a low intensity component ( $\sim 1\%$ ) located around 289.5 eV that can be attributed to  $\text{CO}_3$  species. 2 % of lithium type  $\text{Li}_2\text{CO}_3$  could then be used to fit the Li 1s spectrum. The corresponding component is located around 55.5 eV.

The Li 1s peak attributed to  $\text{Li}_2\text{CO}_3$  has a low intensity and could reflects the Li1s peak asymmetry towards high BE and it is related to the C 1s component located at 289.5 eV. Note that the decomposition of the Li 1s spectrum is obviously not unique.
